# Supplementary material
Source: Springer Nature journal article supplement (https://www.springermedizin.de/resource/supplementary/12913_2011_2437_MOESM3_ESM.pdf/9531266)
Supplement: MOESM3 [file 9531266]

2002

Definitive  
surgery

2004

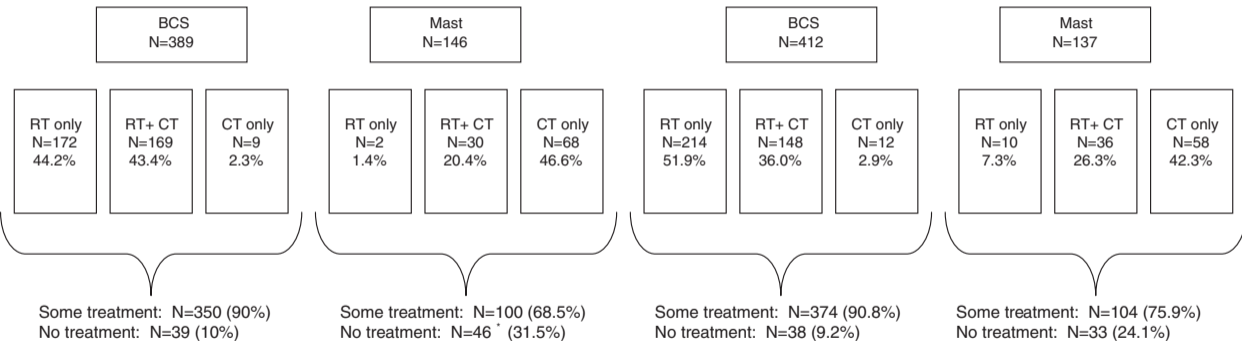

\*One patient refused CT treatment.

BCS: breast conservative surgery, Mast: mastectomy, RT: radiotherapy, CT: chemotherapy.
